# Supplementary material for: Homeodomain-interacting protein kinase 2-dependent repression of myogenic differentiation is relieved by its caspase-mediated cleavage
Source: PubMed Central journal article supplement — Nucleic Acids Res. 2013 Apr 24;41(11):5731–45. doi: 10.1093/nar/gkt262 (PMC3675480; doi:10.1093/nar/gkt262), 2013-04-24
Supplement: supp_gkt262_nar-03227-v-2012-File003.pdf [file supp_gkt262_nar-03227-v-2012-File003.pdf]

## Supplemental Information

### Homeodomain interacting protein kinase 2-dependent repression of myogenic differentiation is relieved by its caspase-mediated cleavage

Laureano de la Vega, Juliane Hornung, Elisabeth Kremmer, Maja Milanovic and M. Lienhard SCHMITZ

### Inventory of Supplemental Information

Two supplemental Tables, one supplemental Figure

### Supplemental Table 1

#### Antibodies, plasmids and reagents

#### Antibodies

| Epitope                    | Species           | Designation | Supplier   |
|----------------------------|-------------------|-------------|------------|
| HIPK2 amino acids 2-191    | monoclonal rat    | N6A10       | this paper |
| HIPK2 amino acids 781-1191 | monoclonal rat    | C1B3        | this paper |
| Flag                       | mouse monoclonal  | M2          | Sigma      |
| $\beta$ -tubulin           | mouse monoclonal  | tub 2.1     | Sigma      |
| MyHC                       | Rabbit polyclonal | H-300       | Santa Cruz |
| Myogenin                   | Mouse monoclonal  | F5D         | Santa Cruz |
| MEF2                       | Rabbit polyclonal | C-21        | Santa Cruz |
| HDAC3                      | Rabbit polyclonal | H-99        | Santa Cruz |

|                                        |                   |              |                           |
|----------------------------------------|-------------------|--------------|---------------------------|
| HDAC4                                  | Rabbit polyclonal | H-92         | Santa Cruz                |
| Myc                                    | Mouse monoclonal  | 9E10         | Roche Applied Science     |
| Cy3-coupled secondary antibody         |                   | 106-165-003  | Jackson Immunoresearch    |
| Dylight 405-coupled secondary antibody | Goat Anti-Rabbit  | 111-475-003  | Jackson Immunoresearch    |
| HA                                     | rat monoclonal    | 3F10         | Roche Applied Science     |
| GFP                                    | mouse monoclonal  | 7.1 and 13.1 | Roche Applied Science     |
| Acetyl-lysine                          | rabbit polyclonal | #9441        | Cell signaling Technology |
| HDAC3                                  | rabbit polyclonal | H99          | Santa Cruz Biotechnology  |

## Plasmids

| Plasmid                                               | Origin                                | Citation                            |
|-------------------------------------------------------|---------------------------------------|-------------------------------------|
| pLKO.1-puro HIPK2                                     | MISSION® shRNA vectors, Sigma-Aldrich | Mol Cell. 2012 May 25;46(4):472-83. |
| pLKO.1-puro scramble                                  | MISSION® shRNA vectors, Sigma-Aldrich | Mol Cell. 2010 Feb 26;37(4):503-15. |
| 290-pHAGE                                             | M. Schmidt-Supprian (Martinsried)     | Mol Cell. 2012 May 25;46(4):472-83. |
| packaging vectors<br>pMDLg/pRRE<br>pRSV-Rev<br>pHCMVG | D. Baltimore (Pasadena)               | J Virol. 1998 Nov;72(11):8463-71.   |
| 290-pHAGE-Flag-HIPK2                                  | Already Described                     | Mol Cell. 2012 May 25;46(4):472-83. |
| Flag-MEF2C                                            | XJ. Yang                              | Mol Cell Biol. 2005                 |

|                     |                               |                                                                        |
|---------------------|-------------------------------|------------------------------------------------------------------------|
|                     | (Montreal)                    | March; 25(6): 2273–2287.                                               |
| HA-MEF2C            | XJ. Yang<br>(Montreal)        | Mol Cell Biol. 2005<br>March; 25(6): 2273–2287.                        |
| Flag-HDAC1          | A.S. Baldwin<br>(Chapel Hill) | Mol Cell Biol. 2001<br>Oct;21(20):7065-77.                             |
| Flag-HDAC2          | A.S. Baldwin<br>(Chapel Hill) | Mol Cell Biol. 2001<br>Oct;21(20):7065-77.                             |
| Flag-HDAC3          | P. Gallinari<br>(Rome)        | Proc Natl Acad Sci U S<br>A. 2007 October 30;<br>104(44): 17335–17340. |
| HA-HDAC3            | XJ. Yang<br>(Montreal)        | Mol Cell Biol. 2007<br>February; 27(4): 1280–1295                      |
| Flag-HDAC4          | P. Gallinari<br>(Rome)        | Proc Natl Acad Sci U S<br>A. 2007 October 30;<br>104(44): 17335–17340. |
| HA-HDAC4            | N. Tsumaki<br>(Kyoto)         | Development. 2012<br>Mar;139(6):1153-63                                |
| Myc-HDAC4           | M. Kracht<br>(Giessen)        | Nucleic Acids Res.<br>2012 Oct 19, in press                            |
| Flag-HDAC5          | M. Kracht<br>(Giessen)        | Nucleic Acids Res.<br>2012 Oct 19, in press                            |
| Flag-HDAC6          | XJ. Yang<br>(Montreal)        | Mol Cell. 2007 Jul<br>20;27(2):197-213.                                |
| Flag-HIPK2          | already described             | Nat Cell Biol. 2002<br>Jan;4(1):1-10.                                  |
| Flag-HIPK2<br>K221A | already described             | Nat Cell Biol. 2002<br>Jan;4(1):1-10.                                  |
| Flag-HIPK2<br>DD/AA | already described             | EMBO J. 2006 May<br>3;25(9):1883-94.                                   |
| Flag-HIPK2<br>1-916 | already described             | EMBO J. 2006 May<br>3;25(9):1883-94.                                   |
| GFP-HIPK2           | already described             | Nat Cell Biol. 2002<br>Jan;4(1):1-10.                                  |
| Myogenin-<br>Luc    | P.L. Puri (Rome)              | J Biol Chem. 2000 Nov<br>24;275(47):36750-7.                           |
| HA-HIPK2            | already described             | EMBO J. 2010 Nov<br>17;29(22):3750-61.                                 |
| YFP-CBP             | already described             | Oncogene. 2012 Feb<br>2;31(5):611-23.                                  |

|                                |                          |                                                            |
|--------------------------------|--------------------------|------------------------------------------------------------|
| Calcineurin<br>$\Delta$ CAM-AI | E. Muñoz<br>(Córdoba)    | J Immunol. 2004 Feb<br>15;172(4):2341-51                   |
| pSUPER-<br>shHDAC3             | L DiCroce<br>(Barcelona) | Proc Natl Acad Sci U S<br>A. 2006 Jan<br>31;103(5):1400-5. |
| HIPK2<br>shRNA<br>resistant    | Point<br>mutagenesis     | This paper                                                 |

## Reagents

| Reagent                                             | Supplier      |
|-----------------------------------------------------|---------------|
| TSA                                                 | SIGMA         |
| zVAD-fmk                                            | BD Pharmingen |
| 1- $\beta$ -D-Arabi-<br>furanosylcytosine<br>(AraC) | CALBIOCHEM    |
| Streptavidin<br>magnetic beads                      | QIAGEN        |
| $\lambda$ phosphatase                               | NEB           |
| Hoechst 33342                                       | SIGMA         |
| Lipofectamine<br>2000                               | Invitrogen    |
| Rotifect                                            | Carl Roth     |
| PEI                                                 | SIGMA         |

## Primers

| Primer name          | Sequence                |
|----------------------|-------------------------|
| MyLC-<br>forward     | AAGATCGAGTTCTCTAAGGAGCA |
| MyLC-<br>reverse     | TCATGGGCAGAACTGTTCAA    |
| Myogenin-<br>forward | GAGACATCCCCCTATTTCTACCA |
| Myogenin-<br>reverse | GCTCAGTCCGCTCATAGCC     |
| HIPK2-<br>forward    | ACACCACTAATGGTAGCAACTCT |
| HIPK2-<br>reverse    | GGGTAAAGGGCACCGCATA     |
| Bio-MEF2-<br>forward | Bio-GCAGCAACAGCTTAGAGG  |

|                                                                          |                                              |
|--------------------------------------------------------------------------|----------------------------------------------|
| MEF2-<br>reverse                                                         | TCCATCAGGTTCGGAAAA                           |
| Bio-<br>Luciferase-<br>forward                                           | Bio-GATCTGAGCTTGGCATTTC                      |
| Luciferase-<br>reverse                                                   | CAGGAACCAGGGCGTA                             |
| Mutagenesis<br>primer to<br>make HIPK2<br>shRNA<br>resistant-<br>Forward | GGAGCATCCACCCATGATCCAAAACAATGCAAGCGGGGCC     |
| Mutagenesis<br>primer to<br>make HIPK2<br>shRNA<br>resistant-<br>Reverse | GGCCCCGCTTGCTTGCATTGTTTTGGATCATGGGTGGATGCTCC |
| MEF2 sites<br>in Myogenin<br>promoter<br>ChIP primer<br>Forward          | ATGTAATCCACTGGAAACG                          |
| MEF2 sites<br>in Myogenin<br>promoter<br>ChIP primer<br>Reverse          | CATCAGGTTCGGAAAAGG                           |

### Supplemental Figure 1.

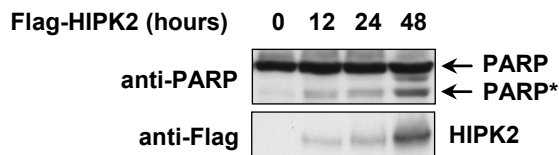

**Fig. S1.** Cells were transfected to express HIPK2 for the indicated periods. Caspase-mediated cleavage of endogenous PARP1 was revealed with specific antibodies, the cleavage product is shown as PARP\*.

## Supplemental Table 2

Known HIPK2 interactors as regulators of muscle differentiation and function

| HIPK2 interacting protein | Reference                                                                                                                                                                  |
|---------------------------|----------------------------------------------------------------------------------------------------------------------------------------------------------------------------|
| AML1 (RUNX1)              | Wang X, Blagden C, Fan J, Nowak SJ, Taniuchi I, Littman DR, Burden SJ. <i>Genes Dev.</i> 2005 Jul 15;19(14):1715-22                                                        |
| NLK                       | Satoh K, Ohnishi J, Sato A, Takeyama M, Iemura S, Natsume T, Shibuya H. <i>Mol Cell Biol.</i> 2007 Nov;27(21):7623-30.                                                     |
| c-Myb                     | Kolodziejska KM, Noyan-Ashraf MH, Nagy A, Bacon A, Frampton J, Xin HB, Kotlikoff MI, Husain M. <i>Circ Res.</i> 2008 Mar 14;102(5):554-61.                                 |
| c-Ski                     | Kobayashi N, Goto K, Horiguchi K, Nagata M, Kawata M, Miyazawa K, Saitoh M, Miyazono K. <i>Genes Cells.</i> 2007 Mar;12(3):375-85                                          |
| Smad                      | Allen DL, Unterman TG. <i>Am J Physiol Cell Physiol.</i> 2007 Jan;292(1):C188-99                                                                                           |
| Mdm2                      | Guo CS, Degrin C, Fiddler TA, Stauffer D, Thayer MJ. <i>J Biol Chem.</i> 2003 Jun 20;278(25):22615-22.                                                                     |
| PCAF                      | Sartorelli V, Puri PL, Hamamori Y, Ogryzko V, Chung G, Nakatani Y, Wang JY, Keddes L. <i>Mol Cell.</i> 1999 Nov;4(5):725-34                                                |
| p53                       | Soddu S, Blandino G, Scardigli R, Coen S, Marchetti A, Rizzo MG, Bossi G, Cimino L, Crescenzi M, Sacchi A. <i>J Cell Biol.</i> 1996 Jul;134(1):193-204                     |
| CBP                       | Roth JF, Shikama N, Henzen C, Desbaillets I, Lutz W, Marino S, Wittwer J, Schorle H, Gassmann M, Eckner R. <i>EMBO J.</i> 2003 Oct 1;22(19):5186-96                        |
| p300                      | Puri PL, Avantaggiati ML, Balsano C, Sang N, Graessmann A, Giordano A, Levrero M. <i>EMBO J.</i> 1997 Jan 15;16(2):369-83                                                  |
| Daxx                      | Gupta A, Hou R, Liu L, Hiroyasu S, Hadix JA, Huggins GS, Sibinga NE. <i>J Cell Biochem.</i> 2009 Jun 1;107(3):438-47                                                       |
| JNK                       | Khurana A, Dey CS. <i>J Muscle Res Cell Motil.</i> 2004;25(8):645-55                                                                                                       |
| CtBP                      | Zhang CL, McKinsey TA, Lu JR, Olson EN. <i>J Biol Chem.</i> 2001 Jan 5;276(1):35-9.                                                                                        |
| Groucho                   | Miller RR, Okkema PG. <i>PLoS Genet.</i> 2011 Aug;7(8):e1002210.                                                                                                           |
| mSin3                     | van Oevelen C, Bowman C, Pellegrino J, Asp P, Cheng J, Parisi F, Micsinai M, Kluger Y, Chu A, Blais A, David G, Dynlacht BD. <i>Mol Cell Biol.</i> 2010 Dec;30(24):5686-97 |
| HDAC3                     | Grégoire S, Xiao L, Nie J, Zhang X, Xu M, Li J, Wong J, Seto E, Yang XJ. <i>Mol Cell Biol.</i> 2007 Feb;27(4):1280-95                                                      |
| Nkx                       | Fu Y, Yan W, Mohun TJ, Evans SM. <i>Development.</i> 1998 Nov;125(22):4439-49                                                                                              |
